# Supplementary material for: A Method of Three-Dimensional Micro-Rotational Flow Generation for Biological Applications
Source: MDPI journal article supplement (doi:10.3390/mi7080140), 2016-08-10
Supplement: s1 [file s1]

# Supplementary Materials: A Method of Three-Dimensional Micro-Rotational Flow Generation for Biological Applications

Yaxiaer Yalikun, Yasunari Kanda and Keisuke Morishima

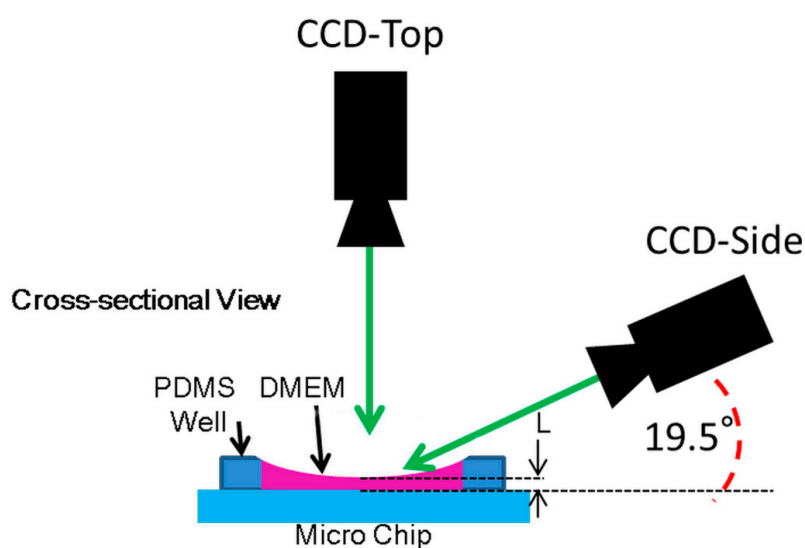

**Figure S1.** Schematic drawing to show how the image was taken from two sides. There was a CCD camera on the top and another on one side. The side camera was at an angle of 19.5° to the center part of the chip.

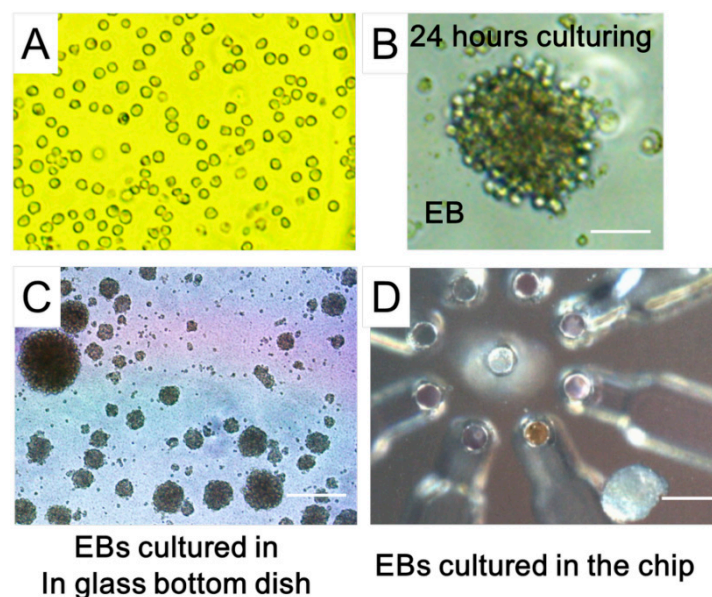

**Figure S2.** Images of EBs taken after preparation and culturing. (A) The EBs were prepared from ES cells. (B) After culturing for 48 h, the ES cells were aggregated as EBs on a 96-well U-bottom plate. (C) EBs were removed from the U-bottom plate, and cultured on a gelatin glass bottom dish for 12 h. The image was taken by phase-contrast microscopy. (D) EBs after rotating for 10 min, orbitally moving them for 10 min, then culturing them for 12 h. The image was taken by bright field microscopy.
